# Supplementary material for: Stability of working memory in continuous attractor networks under the control of short-term plasticity
Source: PubMed Central journal article supplement (PMC6493776; doi:10.1371/journal.pcbi.1006928), 2019-04-19
Supplement: pcbi.1006928.s010.pdf [file pcbi.1006928.s010.pdf]

**S1 Table. Parameters for spiking simulations**

| Parameter name                           | Parameter Symbol    | Units | Excitatory neurons | Inhibitory neurons |
|------------------------------------------|---------------------|-------|--------------------|--------------------|
| Neuron number                            | $N_{\bullet}$       | 1     | $N_E = 800$        | $N_I = 200$        |
| Poisson neuron number                    | $N_{\text{ext}}$    | 1     | 1000               | 1000               |
| Frequency of Poisson neurons             | $\nu_{\text{ext}}$  | Hz    | 2.6                | 2.6                |
| Membrane capacitance                     | $C_m$               | pF    | 500                | 200                |
| Exc. reversal potential                  | $V_E$               | mV    | 0                  | 0                  |
| Inh. reversal potential                  | $V_I$               | mV    | -70                | -70                |
| Leak reversal potential                  | $V_L$               | mV    | -70                | -70                |
| After spike reset potential              | $V_{\text{res}}$    | mV    | -60                | -60                |
| Spiking threshold                        | $V_{\text{thr}}$    | mV    | -50                | -50                |
| External conductance                     | $g_{\text{ext}}$    | nS    | 2.08               | 1.62               |
| Leak conductance                         | $g_L$               | nS    | 25                 | 20                 |
| External synaptic timescale              | $\tau_{\text{ext}}$ | ms    | 2                  | 2                  |
| Recurr. inh. timescale                   | $\tau_I$            | ms    | 10                 | 10                 |
| Recurr. exc. timescale                   | $\tau_s$            | ms    | 100                | 100                |
| Membrane time constant $\frac{C_m}{g_L}$ | $\tau_m$            | ms    | 20                 | 10                 |
| Refractory period                        | $\tau_{\text{ref}}$ | ms    | 2                  | 1                  |

Parameter values are modified from [1] and [2]. For recurrent conductances see the table in **S2 Table**.

## References

1. Compte A, Brunel N, Goldman-Rakic PS, Wang XJ. Synaptic Mechanisms and Network Dynamics Underlying Spatial Working Memory in a Cortical Network Model. *Cerebral Cortex*. 2000;10:910–923.
2. Brunel N, Wang X. Effects of Neuromodulation in a Cortical Network Model of Object Working Memory Dominated by Recurrent Inhibition. *Journal of Computational Neuroscience*. 2001;11:63–85.
