# Supplementary material for: Stability of working memory in continuous attractor networks under the control of short-term plasticity
Source: PubMed Central journal article supplement (PMC6493776; doi:10.1371/journal.pcbi.1006928), 2019-04-19
Supplement: pcbi.1006928.s011.pdf [file pcbi.1006928.s011.pdf]

**S2 Table. Conductance and connectivity parameters for spiking simulations.**

| STP $U$ [1] | STP $\tau_u$ [ms] | STP $\tau_x$ [ms] | $g_{EE}$ [nS] | $g_{IE}$ [nS] | $g_{EI}$ [nS] | $g_{II}$ [nS] | $\sigma_w$ [rad] |
|-------------|-------------------|-------------------|---------------|---------------|---------------|---------------|------------------|
| 1           | 650               | 150               | 0.03489       | 0.004975      | 2.639         | 1.637         | 0.38             |
| 0.8         | 650               | 150               | 0.03421       | 0.005167      | 2.537         | 1.641         | 0.38             |
| 0.6         | 650               | 150               | 0.0328        | 0.005485      | 2.418         | 1.647         | 0.4              |
| 0.4         | 650               | 150               | 0.0315        | 0.00529       | 2.295         | 1.643         | 0.4              |
| 0.2         | 650               | 150               | 0.03356       | 0.005349      | 2.18          | 1.644         | 0.35             |
| 0.1         | 650               | 150               | 0.03393       | 0.005906      | 2.107         | 1.655         | 0.4              |
| 0.08        | 650               | 150               | 0.03441       | 0.005746      | 2.092         | 1.652         | 0.4              |
| 0.06        | 650               | 150               | 0.03646       | 0.006018      | 2.079         | 1.657         | 0.4              |
| 0.04        | 650               | 150               | 0.03771       | 0.005764      | 2.062         | 1.652         | 0.42             |
| 0.1         | 650               | 140               | 0.03243       | 0.004679      | 2.103         | 1.632         | 0.33             |
| 0.1         | 650               | 120               | 0.02972       | 0.004423      | 2.097         | 1.627         | 0.3              |
| 0.1         | 650               | 160               | 0.03606       | 0.006294      | 2.112         | 1.662         | 0.41             |
| 0.1         | 650               | 180               | 0.04054       | 0.005043      | 2.123         | 1.639         | 0.32             |
| 0.1         | 650               | 200               | 0.04547       | 0.005479      | 2.134         | 1.647         | 0.32             |
| 0.4         | 650               | 140               | 0.03094       | 0.005342      | 2.291         | 1.644         | 0.37             |
| 0.4         | 650               | 160               | 0.03557       | 0.005666      | 2.33          | 1.65          | 0.37             |
| 0.4         | 650               | 120               | 0.02882       | 0.005507      | 2.274         | 1.647         | 0.34             |
| 0.4         | 650               | 180               | 0.03841       | 0.005654      | 2.352         | 1.65          | 0.39             |
| 0.4         | 650               | 200               | 0.04315       | 0.005914      | 2.391         | 1.655         | 0.39             |
| 0.8         | 650               | 120               | 0.02738       | 0.004926      | 2.44          | 1.636         | 0.38             |
| 0.8         | 650               | 140               | 0.03171       | 0.005033      | 2.502         | 1.638         | 0.38             |
| 0.8         | 650               | 160               | 0.03682       | 0.005294      | 2.574         | 1.643         | 0.38             |
| 0.8         | 650               | 180               | 0.03829       | 0.005065      | 2.591         | 1.639         | 0.415            |
| 0.8         | 650               | 200               | 0.0419        | 0.005046      | 2.64          | 1.639         | 0.425            |
| 0.8         | 1000              | 150               | 0.03433       | 0.005176      | 2.548         | 1.641         | 0.38             |
| 0.6         | 1000              | 150               | 0.03371       | 0.005401      | 2.445         | 1.645         | 0.38             |
| 0.4         | 1000              | 150               | 0.03273       | 0.005514      | 2.324         | 1.647         | 0.38             |
| 0.2         | 1000              | 150               | 0.03346       | 0.006019      | 2.195         | 1.657         | 0.37             |
| 0.1         | 1000              | 150               | 0.03295       | 0.006211      | 2.113         | 1.66          | 0.41             |
| 0.08        | 1000              | 150               | 0.03292       | 0.006113      | 2.097         | 1.659         | 0.42             |
| 0.06        | 1000              | 150               | 0.03353       | 0.006124      | 2.08          | 1.659         | 0.43             |
| 0.04        | 1000              | 150               | 0.03517       | 0.006177      | 2.064         | 1.66          | 0.44             |

For all networks  $w_+ = 4.0$ . Recurrent conductance parameters are given for combinations of short-term plasticity parameters according to the following notation:  $g_{EE}$ : excitatory conductance  $g_E$  on excitatory neurons;  $g_{IE}$ : excitatory conductance  $g_E$  on inhibitory neurons;  $g_{EI}$ : inhibitory conductance  $g_I$  on excitatory neurons;  $g_{II}$ : inhibitory conductance  $g_I$  on inhibitory neurons.
